# Supplementary material for: Evolutionary History of Assassin Bugs (Insecta: Hemiptera: Reduviidae): Insights from Divergence Dating and Ancestral State Reconstruction
Source: PLoS One. 2012 Sep 28;7(9):e45523. doi: 10.1371/journal.pone.0045523 (PMC3460966; doi:10.1371/journal.pone.0045523)
Supplement: Table S1 — Taxon list with ID numbers, depository information, GenBank accession numbers, Reduviinae clade classification, microhabitat and prey specialization coding with references and locality information. Footnote: * refers to dried museum specimens. (XLS) [file pone.0045523.s002.xls]

## Sheet: Sheet1
							GenBank Accession numbers
Infraorder	Family	Subfamily	Species	RCW no.	USI	Voucher Depository	16S	18S	28S D2	28S D3-D5	Wg	Clade	Microhabitat	Reference	Prey specialization	Reference	Locality
Nepomorpha	Belostomatidae	Belostomatinae	Abedus breviceps Stal	N/A	N/A	N/A	AY252676	AY252186		AY252440			Aquatic	Schuh and Slater, 1995 [82]	Generalist predator	Schuh and Slater, 1995 [82]
Nepomorpha	Corixidae		Corixidae sp	385	UCR_ENT 00000183	UCR	FJ230383	FJ230456	FJ230537	FJ230615,FJ230694	JQ897872		Aquatic	Schuh and Slater, 1995 [82]	Herbivore	Schuh and Slater, 1995 [82]	USA; California
Pentatomomorpha	Scutellaridae		Austrotichus rugosus Gross	N/A	N/A	N/A	AY252745	AY252171		AY252517			On foliage	Cassis and Loren, 2006 [79]	Herbivore	Cassis and Vanags, 2006 [85]; Schuh and Slater, 1995 [82]	Australia
Pentatomomorpha	Aradidae	Mezirinae	Mezira sayi Kormilev	N/A	N/A	N/A	EU683100	AY252222		EF641177			Bark-associated	Usinger and Matsuda, 1959 [86]; Taylor and Gil, 2009 [87]	Fungivore	Usinger and Matsuda, 1959 [86]; Nardi et al, 2009 [88]
Cimicomorpha	Nabidae	Nabinae	Nabis apicalis Matsumura	N/A	N/A	N/A	EF487292	EF487316		EF487339			On foliage	Lattin, 1989 [89]	Generalist predator	Lattin, 1989 [89]
Cimicomorpha	Tingidae		Corythuca sp	383	UCR_ENT 00000083	UCR	JQ897789	FJ230455	FJ230536	FJ230614, FJ230693			On foliage	own obs; Wellhouse, 1919 [90]	Herbivore	Gibson, 1918 [91]	USA; California
Cimicomorpha	Miridae	Phylinae	Oligotylus carneatus (Knight)	N/A	N/A	N/A	AY252853	AY252377		AY252596			On foliage	Schuh, 2000 [92]	Herbivore	Schuh, 2000 [92]	USA; California
Cimicomorpha	Miridae	Phylinae	Phallospinophylus setosus Weirauch	382	UCR_ENT 00000082	UCR	FJ230382	FJ230454	FJ230535	FJ230613, FJ230692			On foliage	Weirauch 2006 [93], own obs	Herbivore	Weirauch 2006 [93], own obs	USA; California
Cimicomorpha	Reduviidae	Centrocnemidinae	Neocentrocnemis stali (Reuter)	693	UCR_ENT 00001976	UCR		JQ897578	GU188466	GU188447			Bark-associated	Miller, 1956 [94]	?		Laos
		Cetherinae	Cethera musiva (Germar)	757	UCR_ENT 00052215	UCR	JQ897787		JQ897629	JQ897706			Bark-associated	own obs; Louis, 1974 [13]	Termites	Miller, 1953 [12]	Nigeria; Ondo
		Cetherinae	Cethera musiva (Germar)	779	UCR_ENT 00052176	UCR	JQ897788	JQ897552	JQ897630	JQ897707			Bark-associated	own obs; Louis, 1974 [13]	Termites	Miller, 1953 [12]	Nigeria; Ondo
		Cetherinae	Eupheno histrionicus (Stal)	1568	UCR_ENT 00014326	INBIO	JQ897795	JQ897556	JQ897636	JQ897712	JQ897883		Bark-associated	own obs	Termites	Haviland, 1931 [95] (Sorglana)	Costa Rica; Heredia
		Cetherinae	Eupheno pallens (Laporte)	2701	UCR_ENT 00052214	UCR	JQ897796	JQ897557	JQ897637	JQ897713			Bark-associated	own obs	Termites	Haviland, 1931 [95] (Sorglana)	Peru; Madre de Dios
		Ectrichodiinae	Cleptria corallina Villiers	14	AMNH_PBI 00218770	UCR	FJ230388	FJ230462	FJ230543	FJ230621, FJ230700	JQ897871		?	?	Millipede	Lawrence, 1984 [96]	Guinea-Bissau
		Ectrichodiinae	Ectrichodia lucida Lepelletier and Serville	13	AMNH_PBI 00218769	UCR	FJ230387	FJ230461	FJ230542	FJ230620, FJ230699	JQ897878		Ground-dwelling/Leaf Litter	Louis, 1974 [13]	Millipede	Miller, 1953 [12]	Guinea-Bissau
		Ectrichodiinae	nr Microsanta sp	699	UCR_ENT 00052213	UCR	JQ897793		JQ897634	JQ897710	JQ897880		Ground-dwelling/Leaf Litter	Miller, 1953 [12]	Millipede	Haridass, 1985 [97]	Laos
		Ectrichodiinae	Ectrychotes sp	76	AMNH_PBI 00218830	UCR		FJ230479	FJ230560	FJ230638, FJ230717			Ground-dwelling/Leaf Litter	Miller, 1953 [12]	Millipede	Haridass, 1985 [97]	Malaysia; Johor
		Ectrichodiinae	Ectrychotes sp	188	AMNH_PBI 00218932	UCR	FJ230424	FJ230503	FJ230584	FJ230661, FJ230740	JQ897879		Ground-dwelling/Leaf Litter	Miller, 1953 [12]	Millipede	Haridass, 1985 [97]	Malaysia; Selangor
		Ectrichodiinae	Maraenaspis sp	16	AMNH_PBI 00218772	UCR	FJ230389	FJ230463	FJ230544		JQ897889		Ground-dwelling/Leaf Litter	Miller, 1953 [12]	Millipede	Miller, 1953 [12]	Senegal
		Ectrichodiinae	Racelda sp	41	AMNH_PBI 00218801	UCR	FJ230398	FJ230472	FJ230553	FJ230631, FJ230710	JQ897915		Ground-dwelling/Leaf Litter	Miller, 1953 [12]	?		French Guiana; Approuague-Kaw
		Ectrichodiinae	Rhiginia sp	139	AMNH_PBI 00218891	UCR	FJ230410	FJ230490	FJ230571	FJ230648, FJ230727	JQ897917		Ground-dwelling/Leaf Litter	own obs	Millipede	own obs	Nicaragua; Granada
		Emesinae	Emesaya incisa McAtee and Malloch	282	AMNH_PBI 00219017	UCR	FJ230436	FJ230515	FJ230598	FJ230672, FJ230751	JQ897881		Epiphytes/Spider webs	Wygodzinsky, 1966 [98]	Spiders/Generalist predator	Wygodzinsky, 1966 [98]; Readio, 1927 [11]	USA; California
		Emesinae	Empicoris sp	109	AMNH_PBI 00218862	UCR		FJ230486	FJ230567				Epiphytes/On foliage/Spider webs	Wygodzinsky, 1966 [98]	?		Mexico; Sonora
		Emesinae	Mangabea barbiger Weirauch	288	UCR_ENT 00005201	CAS	FJ230441		FJ230602	FJ230674, FJ230753	JQ897888		?		?		Madagascar; Fianarantsoa
		Emesinae	Ploiaria hirticornis (N. Banks)	54	AMNH_PBI 00218808	UCR		FJ230475	FJ230556	FJ230634, FJ230713			On foliage/bark associated/Ground-dwelling/Leaf litter/Spider webs	Wygodzinsky, 1966 [98]	Generalist predator	Wygodzinsky, 1966 [98]	Mexico; Sonora
		Emesinae	Stenolemoides arizonensis (N. Banks)	304	AMNH_PBI 00218753	UCR	FJ230444	FJ230522	FJ230605	FJ230677, FJ230756	JQ897923		Spider Webs	own obs	Spiders	Wygodzinsky, 1966 [98]	USA; California
		Emesinae	Stenolemus sp	147	AMNH_PBI 00218899	UCR	FJ230413		FJ230573				Spider Webs/Bark-associated/Birds' nest	Wygodzinsky, 1966 [98]	?		Ecuador
		Holoptilinae	Ptilocerus sp	587	UCR_ENT 00001974	UCR	GU188453	JQ897599	GU188467	GU188448			Bark-associated	Jacobson, 1911 [7]	Ants	Jacobson, 1911 [7]	Thailand
		Holoptilinae	Ptilocnemus femoralis Horvath	220	AMNH_PBI 00218963	AMNH	FJ230431	FJ230509	FJ230591	FJ230667, FJ230746			Bark-associated	own obs; Malipatil, 1985 [99]	Ants	Malipatil, 1985 [99]; McKeown, 1944 [100]	Australia; South Australia
		Hammacerinae	Microtomus cinctipes (Stal)	141	AMNH_PBI 00218893	UCR	FJ230411	FJ230491		FJ230649, FJ230728			Bark-associated	Readio, 1927 [11]; Champion, 1899 [101]	?		Nicaragua
		Hammacerinae	Microtomus sp	30	AMNH_PBI 00218785	UCR	FJ230395	FJ230469		FJ230628, FJ230707			Bark-associated	Readio, 1927 [11]; Champion, 1899 [101]	?		French Guiana; Maripasoula
		Harpactorinae	Acanthiscium seminigrum Stal	391	UCR_ENT 00000074	FCAP	FJ230450	FJ230530	FJ230607	FJ230685, FJ230764			On foliage	own obs	?		Brazil
		Harpactorinae	Agriocoris flavipes (Fabricius)	132	AMNH_PBI 00218884	UCR		FJ230488	FJ230569	FJ230646, FJ230725			On foliage	own obs	?		French Guiana; Cayenne
		Harpactorinae	Apiomerus lanipes (Fabricius)	281	AMNH_PBI 00219016	UCR	FJ230435	FJ230514	FJ230597	FJ230671, FJ230750	JQ897868		On foliage	Readio, 1927 [11]	Generalist predator	Gil-Santana, 2002 [102]; Readio, 1927 [11]
		Harpactorinae	Apiomerus ochropterus Stal	22	AMNH_PBI 00218777	UCR	FJ230393	FJ230466	FJ230548	FJ230625, FJ230704	JQ897869		On foliage	Readio, 1927 [11]	Generalist predator	Readio, 1927 [11]	French Guiana; Cayenne
		Harpactorinae	Arilus cristatus (Linne)	71	AMNH_PBI 00218826		FJ230402	FJ230477	FJ230558	FJ230636, FJ230715			On foliage	Readio, 1927 [11]	Generalist predator	Readio, 1927 [11]	USA; Pennsylvania
		Harpactorinae	Castolus subinermis (Stal)	347	UCR_ENT 00000089	UCR	FJ230446	FJ230526		FJ230681, FJ230760			On foliage	own obs	Generalist predator	Koponen, 1988 [103]	USA; Arizona
		Harpactorinae	Coranus callosus Stal	244	AMNH_PBI 00218984	UCR	FJ230433	FJ230511	FJ230594	FJ230669, FJ230748			Ground-dwelling	Wachmann et al, 2006 [104]	Generalist predator	Sahayaraj and Ambrose, 1993 [105]; Miller, 1953 [12]	Australia; Western Australia
		Harpactorinae	Euagoras sp	194	AMNH_PBI 0021928	UCR	FJ230427	FJ230505	FJ230587	FJ230663, FJ230742			On foliage	own obs	?		Malaysia; Selangor
		Harpactorinae	Harpactorinae sp	190	AMNH_PBI 00218934	UCR	FJ230425	FJ230504	FJ230585	FJ230662, FJ230741			On foliage	own obs	?		Malaysia; Selangor/Pahang border
		Harpactorinae	Heniartes putumayo Wygodzinsky	395	UCR_ENT 00000079	FCAP			FJ230609	FJ230686, FJ230766			On foliage	own obs; Wygodzinsky, 1948 [106]	Generalist predator	Wygodzinsky, 1948 [106]	South America
		Harpactorinae	Micrauchenus lineola (Fabricius)	35	AMNH_PBI 00218790	UCR	FJ230397	FJ230471	FJ230552	FJ230630, FJ230709			Bark-associated	Berenger & Pluot-Sigwalt, 2009 [107]	Termites	Berenger & Pluot-Sigwalt, 2009 [107]	French Guiana
		Harpactorinae	Poecilosphodrus gratiosus (Stal)	214	AMNH_PBI 00218958	UCR	FJ230429	FJ230507	FJ230589	FJ230665, FJ230744			On foliage	own obs	?		Australia; Western Australia
		Harpactorinae	Pselliopus spinicollis (Champion)	284	AMNH_PBI 00219019	UCR	FJ230438	FJ230517	FJ230600				On foliage	Readio, 1927 [11]	Generalist predator	Readio, 1927 [11]	USA; California
		Harpactorinae	Pselliopus zebra (Stal)	280	AMNH_PBI 00219015	UCR	FJ230434	FJ230513	FJ230596	FJ230670, FJ230749			On foliage	Readio, 1927 [11]	Generalist predator	Readio, 1927 [11]	Guatemala; Sacatepequez
		Harpactorinae	Pyrrhosphodrus amazonus Stal	31	AMNH_PBI 00218786	UCR	FJ230396	FJ230470	FJ230551	FJ230629, FJ230708			On foliage	own obs	?		French Guiana; Montsinery
		Harpactorinae	Rhaphidosoma decorsei Jeannel	17	AMNH_PBI 00218773	UCR	FJ230390	FJ230464	FJ230545	FJ230622, FJ230701			On foliage (grasses)	Miller, 1953 [12]	Generalist predator	Haridass, 1985 [97]	Senegal; Thies
		Harpactorinae	Rhynocoris segmentarius (Germar)	4	AMNH_PBI 00218760	UCR	FJ230384	FJ230457	FJ230538	FJ230616, FJ230695			On foliage	Louis, 1974 [13]; Miller, 1953 [12]	Generalist predator	Miller, 1953 [12]; Louis, 1974 [13]; Haridass, 1985 [97]	South Africa; Limpopo
		Harpactorinae	Ricolla quadrispinosa (Linne)	396	UCR_ENT 00000075	FCAP		FJ230531	FJ230610	FJ230687			On foliage	Haviland, 1931 [95]	?		Brazil; Mato Grosso
		Harpactorinae	Sinea diadema Caudell	108	AMNH_PBI 00218861	UCR	FJ230408	FJ230485	FJ230566	FJ230644, FJ230723			On foliage	Readio, 1927 [11]; Haviland, 1931 [95]	Generalist predator	Readio, 1927 [11]	Mexico; Chihuahua
		Harpactorinae	Ulpius sp	370	UCR_ENT 00000086	UCR	FJ230449	FJ230529		FJ230684, FJ230763			?		?		Madagascar; Toliara
		Harpactorinae	Velinus sp	197	AMNH_PBI 00218941	UCR	FJ230428	FJ230506	FJ230588	FJ230664, FJ230743			On foliage	own obs	?		Malaysia; Pahang
		Harpactorinae	Vesbius purpureus (Thunberg)	184	AMNH_PBI 00218928	UCR	FJ230422	FJ230501	FJ230582	FJ230659, FJ230737			On foliage	own obs	?		Malaysia; Pahang
		Harpactorinae	Zelus longipes (Linne)	6	AMNH_PBI 00218762	UCR	FJ230385	FJ230458	FJ230539	FJ230617, FJ230696			On foliage	Haviland, 1931 [95]; Readio, 1927 [11]; own obs	Generalist predator	Readio, 1927 [11]; Gil-Santana & Alves 2011 [102]; own obs	Dominican Republic; Santiago
		Harpactorinae	Zelus nr renardii	90	AMNH_PBI 00218842	UCR		FJ230484	FJ230565	FJ230643, FJ230722			On foliage	Haviland, 1931 [95]; Readio, 1927 [11]; own obs	Generalist predator	Readio, 1927 [11]; Gil-Santana & Alves 2011 [102]; own obs	Mexico; Chihuahua
		Harpactorinae	Zelus renardii Kolenati	403	UCR_ENT 00000076	UCR	FJ230453	FJ230534		FJ230691, FJ230770			On foliage	Haviland, 1931 [95]; Readio, 1927 [11]; own obs	Generalist predator	Readio, 1927 [11]; Gil-Santana & Alves 2011 [102]; own obs	USA; California
		Peiratinae	Ectomocoris atrox (Stal)	363	AMNH_PBI 00000088	UCR	FJ230447	FJ230527		FJ230682, FJ230761	JQ897876		Ground-dwelling/ leaf litter	own obs; Miller, 1956 [109]; Louis, 1974 [13]; Miller, 1953 [12]	Generalist predator	Ambrose, 1987 [110]	Singapore
		Peiratinae	Ectomocoris ornatus (Stal)	246	AMNH_PBI 00218985	UCR		FJ230512	FJ230595		JQ897877		Ground-dwelling/ leaf litter	own obs; Miller, 1956 [109]; Louis, 1974 [13]; Miller, 1953 [12]	Generalist predator	Ambrose, 1987 [110]	Australia; New South Wales
		Peiratinae	Peirates punctorius (Stal)	216	AMNH_PBI 00218960	UCR	FJ230430	FJ230508	FJ230590	FJ230666, FJ230745	JQ897908		Ground-dwelling	own obs; Miller, 1956 [109]	Generalist predator	Ambrose, 1987 [110]	Australia; New South Wales
		Peiratinae	Rasahus thoracicus Stal	313	AMNH_PBI 00219025	UCR		FJ230525		FJ230679, FJ230758	JQ897916		Ground-dwelling	own obs; Readio, 1927 [11]	Generalist predator	Readio, 1927 [11]	USA; California
		Phymatinae	Lophoscutus sp	52	AMNH_PBI 00218806	UCR	FJ230400	FJ230474	FJ230555	FJ230633, FJ230712			On foliage	own obs; Kormilev, 1981 [111]; Miller, 1956 [109]	Generalist predator	Kormilev, 1981 [111]; Miller, 1956 [109]	Mexico; Sonora
		Phymatinae	Macrocephalus barberi Evans	283	AMNH_PBI 00219018	UCR	FJ230437	FJ230516	FJ230599	FJ230673, FJ230752			On foliage	own obs; Kormilev, 1981 [111]; Miller, 1956 [109]	Generalist predator	Kormilev, 1981 [111]; Miller, 1956 [109]	USA; California
		Phymatinae	Macrocephalus sp	128	AMNH_PBI 00218881	UCR	FJ230409	FJ230487	FJ230568	FJ230645, FJ230724	JQ897887		On foliage	own obs; Kormilev, 1981 [111]; Miller, 1956 [109]	Generalist predator	Kormilev, 1981 [111]; Miller, 1956 [109]	Mexico; Chihuahua
		Phymatinae	Phymata acutangula Guerin	29	AMNH_PBI 00218783	UCR	FJ230394	FJ230468	FJ230550	FJ230627, FJ230706			On foliage	Haviland, 1931 [95] ; own obs; Miller, 1956 [109]; Balduf, 1941 [112]	Generalist predator	Balduf, 1943 [113]; Balduf, 1948 [114]; Miller, 1956 [109]	French Guiana; Montsinery
		Phymatinae	Phymata fortificata Herrich-Schaeffer	28	AMNH_PBI 00218784	UCR		FJ230467	FJ230549	FJ230626, FJ230705	JQ897909		On foliage	Haviland, 1931 [95] ; own obs; Miller, 1956 [109]; Balduf, 1941 [112]	Generalist predator	Balduf, 1943 [113]; Balduf, 1948 [114]; Miller, 1956 [109]	French Guiana; Montsinery
		Phymatinae	Phymata pacifica Evans	70	AMNH_PBI 00218825	UCR	FJ230401	FJ230476	FJ230557	FJ230635, FJ230714			On foliage	Haviland, 1931 [95] ; own obs; Miller, 1956 [109]; Balduf, 1941 [112]	Generalist predator	Balduf, 1943 [113]; Balduf, 1948 [114]; Miller, 1956 [109]	USA; California
		Phymatinae	Phymata sp	87	AMNH_PBI 00218851	UCR	FJ230407	FJ230483	FJ230564	FJ230642, FJ230721	JQ897910		On foliage	Haviland, 1931 [95] ; own obs; Miller, 1956 [109]; Balduf, 1941 [112]	Generalist predator	Balduf, 1943 [113]; Balduf, 1948 [114]; Miller, 1956 [109]	Mexico; Sonora
		Physoderinae	Physoderes impexa (Distant)	1572	UCR_ENT 00052181	UCR	JQ897830	JQ897591	JQ897662	JQ897748	JQ897911		Leaf litter	Miller, 1953 [12]	Generalist predator	Miller, 1954 [115]	Vietnam; Vinh Phuc
		Physoderinae	Physoderes nr. vestita	1585	UCR_ENT 00052186	UCR	JQ897831	JQ897592	JQ897663	JQ897749	JQ897912		Bark-associated	own obs	Generalist predator	Miller, 1954 [115]	Brunei; Temburong
		Physoderinae	Physoderes sp	686	UCR_ENT 00052221	ZMUC	JQ897832	JQ897593	JQ897664		JQ897913		Bark-associated	own obs	Generalist predator	Miller, 1954 [115]	Laos; Champasak
		Reduviinae	Acanthaspis bilineolata (de Beauvois)	783	UCR_ENT 00052224	UCR	JQ897773	JQ897540		JQ897690	JQ897859	Acanthaspis	Ground-dwelling/Bark-associated	own obs, Louis 1974 [13]	Ants	Haridass, 1985 [97]; Odhiambo, 1958 [116]	Nigeria; Osun
		Reduviinae	Acanthaspis gulo Stal	707	UCR_ENT 00052222	ZMUC	JQ897774		JQ897619	JQ897691	JQ897860	Acanthaspis	Ground-dwelling/Bark-associated	Louis, 1974 [13]	Ants	Haridass, 1985 [97]; Odhiambo, 1958 [116]	Laos; Vientiane
		Reduviinae	Acanthaspis iracunda Stal	19	AMNH_PBI 00218775	UCR	FJ230392		FJ230547	FJ230624, FJ230703	JQ897861	Acanthaspis	Ground-dwelling/Bark-associated	Louis, 1974 [13]	Ants	Haridass, 1985 [97]; Odhiambo, 1958 [116]	Guinea-Bissau
		Reduviinae	Acanthaspis iracunda Stal	736	UCR_ENT 00052190	UCR	JQ897775	JQ897541		JQ897692	JQ897862	Acanthaspis	Ground-dwelling/Bark-associated	own obs, Louis 1974 [13]	Ants	Haridass, 1985 [97]; Odhiambo, 1958 [116]	Nigeria; Ondo
		Reduviinae	Acanthaspis laosensis Distant	852	UCR_ENT 00052193	TIGER	JQ897776			JQ897693		Acanthaspis	Ground-dwelling/Bark-associated	Louis, 1974 [13]	Ants	Haridass, 1985 [97]; Odhiambo, 1958 [116]	Thailand; Suphan Buri
		Reduviinae	Acanthaspis nr. bimaculata	547	UCR_ENT 00052192	TIGER	JQ897777	JQ897542		JQ897694	JQ897863	Acanthaspis	Ground-dwelling/Bark-associated	Louis, 1974 [13]	Ants	Haridass, 1985 [97]; Odhiambo, 1958 [116]	Thailand; Chaiyaphum
		Reduviinae	Acanthaspis quadriannulata Stal	684	UCR_ENT 00004575	UCR	JQ897778		JQ897620	JQ897695	JQ897864	Acanthaspis	Ground-dwelling/Bark-associated	Louis, 1974 [13]	Ants	Haridass, 1985 [97]; Odhiambo, 1958 [116]	Laos
		Reduviinae	Acanthaspis sulcipes Signoret	737	UCR_ENT 00052174	UCR	JQ897781	JQ897545		JQ897698	JQ897866	Acanthaspis	Ground-dwelling/Bark-associated	own obs, Louis 1974 [13]	Ants	Haridass, 1985 [97]; Odhiambo, 1958 [116]	Nigeria; Osun
		Reduviinae	Acanthaspis westermanni Reuter	508	UCR_ENT 00052218	TIGER	JQ897782	JQ897546		JQ897699	JQ897867	Acanthaspis	Ground-dwelling/Bark-associated	Louis, 1974 [13]	Ants	Haridass, 1985 [97]; Odhiambo, 1958 [116]	Thailand; Phetchabun
		Reduviinae	Acanthaspis sp	1589	UCR_ENT 00052205	UCR	JQ897779	JQ897543	JQ897621	JQ897696		Acanthaspis	Ground-dwelling/Bark-associated	Odhiambo, 1958 [116]; Miller, 1953 [12]; Louis, 1974 [13]	Ants	Haridass, 1985 [97]; Odhiambo, 1958 [116]	Singapore
		Reduviinae	Acanthaspis sp	73	AMNH_PBI 00218828	UCR	FJ230403	FJ230478	FJ230559	FJ230637, FJ230716	JQ897865	Acanthaspis	Ground-dwelling/Bark-associated	Louis, 1974 [13]	Ants	Haridass, 1985 [97]; Odhiambo, 1958 [116]	South Africa; Northern Cape
		Reduviinae	Acanthaspis sp	853	UCR_ENT 00052175	TIGER	JQ897780	JQ897544	JQ897622	JQ897697		Acanthaspis	Ground-dwelling/Bark-associated	Louis, 1974 [13]	Ants	Haridass, 1985 [97]; Odhiambo, 1958 [116]	Thailand; Chanthaburi
		Reduviinae	Alloeocranum arboricolum Miller	1579	UCR_ENT 00052180	UCR	JQ897783	JQ897547	JQ897623	JQ897700		Reduvius	?		?		Brunei; Temburong
		Reduviinae	Censorinus ferrugineous Distant	2762	UCR_ENT 00046577	CAS	JQ897786	JQ897551	JQ897628	JQ897705		Censorinus	?		?		Madagascar
		Reduviinae	Durevius tuberculatus (Villiers)	2763	UCR_ENT 00046578	CAS	JQ897790	JQ897553	JQ897631	JQ897708		Reduvius	?		?		Madagascar; Fianarantsoa
		Reduviinae	Durganda rubra Amyot and Serville	708	UCR_ENT 00052223	ZMUC	JQ897791		JQ897632		JQ897874	Tiarodes	Bark-associated	Miller, 1956 [109]; own obs.	?		Laos; Champasak
		Reduviinae	Dyakocoris vulnerans (Amyot and Serville)	1591	UCR_ENT 00052204	UCR	JQ897792	JQ897554	JQ897633	JQ897709	JQ897875	Velitra	Bark-associated	own obs	?		Brunei; Temburong
		Reduviinae	Gerbelius nr ornatus	552	UCR_ENT 00052225	TIGER	JQ897797	JQ897558		JQ897714		Reduvius	?		?		Thailand; Phetchabun
		Reduviinae	Gerbelius ornatus Distant	709	UCR_ENT 00052220	ZMUC	JQ897799	JQ897560		JQ897716		Reduvius	?		?		Laos; Khammouane
		Reduviinae	Gerbelius ornatus Distant	705	UCR_ENT 00052189	UCR	JQ897798	JQ897559	JQ897638	JQ897715		Reduvius	?		?		Laos; Vientiane
		Reduviinae	Gerbelius sp	704	UCR_ENT 00052219	UCR	JQ897800		JQ897639	JQ897717		Reduvius	?		?		Laos
		Reduviinae	Inara alboguttata Stal	1164	UCR_ENT 00002551	TIGER	JQ897801	JQ897561	JQ897640	JQ897718		Acanthaspis	On foliage	own obs	?		Thailand; Nakhon Nayok
		Reduviinae	Inara flavopicta Stal	82	UCR_ENT 00052191	UCR	FJ230406	FJ230482	FJ230563	JQ897719		Acanthaspis	On foliage	own obs	?		Singapore
		Reduviinae	Inara flavopicta Stal	712	UCR_ENT 00052170	UCR	JQ897802	JQ897562	JQ897641	JQ897720		Acanthaspis	On foliage	own obs	?		Thailand
		Reduviinae	Kayanocoris wegneri Miller	1590	UCR_ENT 00052216	UCR	JQ897803	JQ897563	JQ897642	JQ897721	JQ897884	Reduvius	On foliage	own obs	?		Brunei; Belait
		Reduviinae	Leogorrus immaculatus Champion	1567	UCR_ENT 00014323	INBIO	JQ897804	JQ897564		JQ897722		Reduvius	Bark-associated	Haviland, 1931 [95]; Champion, 1899 [101]; own obs.	Termites	Haviland, 1931 [95]; own obs	Costa Rica; Heredia
		Reduviinae	Leogorrus litura (Fabricius)	9	UCR_ENT 00000068	UCR	FJ230386	FJ230459	FJ230540	FJ230618, FJ230697		Reduvius	Bark-associated	Haviland, 1931 [95]; Champion, 1899 [101]; own obs.	Termites	Haviland, 1931 [95]; own obs	Dominican Republic
		Reduviinae	Leogorrus litura (Fabricius)	1278	UCR_ENT 00012955	MUSM	JQ897805	JQ897565		JQ897723	JQ897885	Reduvius	Bark-associated	Haviland, 1931 [95]; Champion, 1899 [101]; own obs.	Termites	Haviland, 1931 [95]; own obs	Peru; Loreto
		Reduviinae	Leogorrus longiceps Champion	133	AMNH_PBI 00218886	?		FJ230489	FJ230570	FJ230647, FJ230726		Reduvius	Bark-associated	Haviland, 1931 [95]; Champion, 1899 [101]; own obs.	Termites	Haviland, 1931 [95]; own obs	French Guiana; Cayenne
		Reduviinae	Leogorrus longiceps Champion	680	UCR_ENT 00052197	UCR	JQ897806	JQ897566		JQ897724		Reduvius	Bark-associated	Haviland, 1931 [95]; Champion, 1899 [101]; own obs.	Termites	Haviland, 1931 [95]; own obs	Costa Rica; Guanacaste
		Reduviinae	Leogorrus n. sp.	540	UCR_ENT 00052198	UCR	JQ897807	JQ897567		JQ897725	JQ897886	Reduvius	Bark-associated	Haviland, 1931 [95]; Champion, 1899 [101]; own obs.	Termites	Haviland, 1931 [95]; own obs	Costa Rica; Guanacaste
		Reduviinae	Microlestria fuscicollis (Stal)	1809	UCR_ENT 00052185		JQ897808	JQ897568	JQ897643	JQ897726		Microlestria	Bark-associated	own obs	?		French Guiana; Regina
		Reduviinae	Microlestria nr. fuscicollis	1393	UCR_ENT 00052226	UCR	JQ897809	JQ897569	JQ897644	JQ897727		Microlestria	Bark-associated	own obs	?		Ecuador
		Reduviinae	Microlestria nr. fuscicollis	583	UCR_ENT 00052183	UCR	JQ897810	JQ897570		JQ897728		Microlestria	Bark-associated	own obs	?		Costa Rica; Limon
		Reduviinae	Nalata nr. spinicollis	1808	UCR_ENT 00052188	UCR	JQ897812	JQ897572	JQ897646	JQ897730		Nalata	Bark-associated	own obs	?		French Guiana; Regina
		Reduviinae	Nalata setulosa Stal	988	UCR_ENT 00003121	UCR	JQ897813	JQ897573		JQ897731	JQ897890	Nalata	Bark-associated	own obs	?		Mexico; Chiapas
		Reduviinae	Nalata squalida Bergroth	1424	UCR_ENT 00002748	UCR	JQ897815	JQ897575	JQ897648	JQ897733	JQ897892	Nalata	Bark-associated	own obs	?		Ecuador; Napo
		Reduviinae	Nalata sp	1575	UCR_ENT 00014325	INBIO	JQ897814	JQ897574	JQ897647	JQ897732	JQ897891	Nalata	Bark-associated	own obs	?		Costa Rica; Heredia
		Reduviinae	Nanokerala browni Wygodzinsky and Lent	808	UCR_ENT 00052179	TIGER	JQ897816	JQ897576	JQ897649	JQ897734		Psophis	?		?		Thailand; Nakhon Si Thammarat
		Reduviinae	Nanokerala nr. browni	1232	UCR_ENT 00052228	TIGER	JQ897817	JQ897577	JQ897650	JQ897735	JQ897893	Psophis	?		?		Thailand; Surat Thani
		Reduviinae	Neostachyogenys tristis Miller	1588	UCR_ENT 00052184		JQ897818	JQ897579	JQ897651	JQ897736			On foliage	own obs	?		Brunei; Belait
		Reduviinae	Noualhierana furtiva Miller	224	AMNH_PBI 00218966	UCR	FJ230432	FJ230510	FJ230592	FJ230668, FJ230747	JQ897894		?		?		Australia; New South Wales
		Reduviinae	Opisthacidius chinai Lent & Wygodzinsky	1285	UCR_ENT 00012957	MUSM	JQ897819	JQ897580	JQ897652	JQ897737	JQ897896	Zelurus	Bird nest	Lent and Wygodzinsky, 1956 [61]	Generalist predator	Costa Lima, 1940 [117] (Spiniger)	Peru
		Reduviinae	Opisthacidius nr. mexicanus	531	UCR_ENT 00004576	UCR	JQ897820	JQ897581	JQ897653	JQ897738	JQ897897	Zelurus	Bird nest	Lent and Wygodzinsky, 1956 [61]	Generalist predator	Costa Lima, 1940 [117] (Spiniger)	Costa Rica; Guanacaste
		Reduviinae	Opisthacidius sp	1814	UCR_ENT 00052199	UCR	JQ897821	JQ897582	JQ897654	JQ897739	JQ897898	Zelurus	Bird nest	Lent and Wygodzinsky, 1956 [61]	Generalist predator	Costa Lima, 1940 [117] (Spiniger)	French Guiana; Roura
		Reduviinae	Paraplynus lugubris (Stal)	179	AMNH_PBI 00218923	UCR	FJ230420	FJ230499	FJ230580	FJ230657, FJ230736		Acanthaspis	?		?		Guinea-Bisseau
		Reduviinae	Paredocla chevalieri Jeannel	18	AMNH_PBI 00218774	UCR	FJ230391	FJ230465	FJ230546	FJ230623, FJ230702	JQ897902	Acanthaspis	Bark-associated	own obs	?		Senegal
		Reduviinae	Pasiropsis maculata Distant	810	UCR_ENT 00052227	TIGER	JQ897825	JQ897586	JQ897658	JQ897743	JQ897903	Pasiropsis	Bark-associated	own obs	?		Thailand
		Reduviinae	Pasiropsis marginata Distant	807	UCR_ENT 00052177	TIGER	JQ897826	JQ897587		JQ897744	JQ897904	Pasiropsis	Bark-associated	own obs	?		Thailand; Chiang Mai
		Reduviinae	Pasiropsis n. sp	855	UCR_ENT 00052178	TIGER	JQ897827	JQ897588	JQ897659	JQ897745	JQ897905	Pasiropsis	Bark-associated	own obs	?		Thailand; Suphan Buri
		Reduviinae	Pasiropsis sp	1587	UCR_ENT 00052217	UCR	JQ897829	JQ897590	JQ897661	JQ897747	JQ897907	Pasiropsis	Bark-associated	own obs	?		Vietnam; Cat Tien
		Reduviinae	Pasiropsis sp	1582	UCR_ENT 00052195	UCR	JQ897828	JQ897589	JQ897660	JQ897746	JQ897906	Pasiropsis	Bark-associated	own obs	?		Brunei; Temburong
		Reduviinae	Platymeris biguttata (Linne)	175	AMNH_PBI 00218919	UCR	FJ230418	FJ230497	FJ230578	FJ230655, FJ230734			Bark-associated/leaf litter	Fritzcshe, 2008 [118]; Louis, 1974 [13]	Generalist	Miller 1956 [109]; Edwards, 1962 [119]	Guinea-Bisseau
		Reduviinae	Plynoides sp	787	UCR_ENT 00052196	UCR	JQ897833	JQ897594	JQ897665	JQ897750		Acanthaspis	?		?		Nigeria; Ondo
		Reduviinae	*Pseudozelurus arizonicus (N. Banks)	2765	UCR_ENT 00004573	UCR	JQ897834	JQ897595	JQ897666	JQ897751			?		?		USA; Arizona
		Reduviinae	*Pseudozelurus superbus (Champion)	2767	UCR_ENT 00004571	UCR	JQ897835	JQ897596	JQ897667	JQ897752			?		?		Belize; Cayo
		Reduviinae	Psophis sp	1581	UCR_ENT 00052230	UCR	JQ897836	JQ897597	JQ897668	JQ897753	JQ897914	Psophis	Bark-associated	own obs	?		Brunei; Temburong
		Reduviinae	Psophis sp	203	AMNH_PBI 00218947	UCR		JQ897598	JQ897669	JQ897754		Psophis	Bark-associated	own obs	?		Brunei; Temburong
		Reduviinae	*Reduvius personatus (Linne)	2771	UCR_ENT 00004567	UCR	JQ897837	JQ897600				Reduvius	Ground-dwelling	Readio, 1927 [11]	Generalist	Immel, 1954 [120]; Readio, 1927 [11]	USA; Colorado
		Reduviinae	*Reduvius sonoraensis Usinger	2769	UCR_ENT 00004569	UCR	JQ897838					Reduvius	Mammal dwelling/Bark-associated	Ryckman, 1954 [9]; Wygodzinsky and Usinger, 1964 [46]	Generalist	Wood, 1954 [121]; Ryckman, 1954 [9]; Wygodzinsky and Usinger 1964 [46]	USA; California
		Reduviinae	Staliastes rufus (Laporte)	690	UCR_ENT 00052172	UCR	JQ897842	JQ897604	JQ897673	JQ897758	JQ897921	Velitra	Bark-associated	Miller, 1956 [109]	?		Laos
		Reduviinae	Staliastes sp	1578	UCR_ENT 00052231	UCR	JQ897843	JQ897605	JQ897674	JQ897759	JQ897922	Velitra	Bark-associated	Miller, 1956 [109]	?		Brunei; Temburong
		Reduviinae	Tiarodes versicolor (Laporte)	702	UCR_ENT 00052171	UCR	JQ897847	JQ897608	JQ897678	JQ897763	JQ897927		Bark-associated/leaf litter	Miller, 1959 [10]	?		Laos
		Reduviinae	Tapeinus sp	1577	UCR_ENT 00052200	UCR	JQ897845	JQ897606	JQ897676	JQ897761	JQ897925	Velitra	Bark-associated	Miller, 1956 [109]	?		Brunei; Temburong
		Reduviinae	Tapeinus sp	183	AMNH_PBI 00218926	UCR	FJ230421	FJ230500		FJ230658, FJ230737	JQ897926	Velitra	Bark-associated	Miller, 1956 [109]	?		Malaysia; Pahang
		Reduviinae	Tiarodes sp	1584	UCR_ENT 00052206	UCR	JQ897846	JQ897607	JQ897677	JQ897762			Bark-associated/leaf litter	Miller, 1959 [10]	?		Brunei; Temburong
		Reduviinae	Varus flavoannulatus (Stal)	2764	UCR_ENT 00004574	UCR	JQ897852	JQ897613	JQ897683	JQ897768			Bark-associated	Miller, 1953 [12]	?		Zambia; Copperbelt
		Reduviinae	Velitra rubropicta (Amyot and Serville)	685	UCR_ENT 00052173	UCR	JQ897853		JQ897684	JQ897769	JQ897933	Velitra	Bark-associated	Miller, 1956 [109]	Generalist predator	Vennison and Ambrose, 1990 [122]	Laos
		Reduviinae	Velitra sp	1576	UCR_ENT 00052201	UCR	JQ897854	JQ897614	JQ897685	JQ897770	JQ897934	Velitra	Bark-associated	Miller, 1956 [109]	Generalist predator	Vennison and Ambrose, 1990 [122]	Brunei; Temburong
		Reduviinae	Zelurus alcides (Stal)	1571	UCR_ENT 00014324	INBIO	JQ897855	JQ897615	JQ897686	JQ897771	JQ897935	Zelurus	On foliage/Ground-dwelling	Haviland, 1931 [95]	Generalist predator	Gnaspini, 1996 [123]; Ferreira & Martins, 1999 [124]	Costa Rica; Heredia
		Reduviinae	Zelurus petax (Breddin)	167	AMNH_PBI 00218911	UCR	FJ230416	FJ230495		FJ230653, FJ230732		Zelurus	On foliage/Ground-dwelling	Haviland, 1931 [95]	Generalist predator	Gnaspini, 1996 [123]; Ferreira & Martins, 1999 [124]	Ecuador
		Reduviinae	*Zelurus pintoi (Costa Lima)	2850	UCR_ENT 00011856	FSCA	JQ897856	JQ897616	JQ897687			Zelurus	On foliage/Ground-dwelling	Haviland, 1931 [95]	Generalist predator	Gnaspini, 1996 [123]; Ferreira & Martins, 1999 [124]	Bolivia; Santa Cruz
		Reduviinae	Zelurus sp	1812	UCR_ENT 00052209	UCR	JQ897857	JQ897617	JQ897688	JQ897772	JQ897936	Zelurus	On foliage/Ground-dwelling	Haviland, 1931 [95]	Generalist predator	Gnaspini, 1996 [123]; Ferreira & Martins, 1999 [124]	French Guiana; Roura
		Reduviinae	Zelurus sp	1816	UCR_ENT 00052194	UCR	JQ897858	JQ897618	JQ897689		JQ897937	Zelurus	On foliage/Ground-dwelling	Haviland, 1931 [95]	Generalist predator	Gnaspini, 1996 [123]; Ferreira & Martins, 1999 [124]	French Guiana; Regina
		Reduviinae	Zelurus sp	146	AMNH_PBI 00218898	UCR	FJ230412	FJ230492		FJ230650, FJ230729		Zelurus	On foliage/Ground-dwelling	Haviland, 1931 [95]	Generalist predator	Gnaspini, 1996 [123]; Ferreira & Martins, 1999 [124]	Ecuador
		Saicinae	Kiskeyana palassaina Weirauch and Forero	10	AMNH_PBI 00190561	USNM		FJ230460	FJ230541	FJ230619, FJ230698			Ground-dwelling/Leaf litter	Weirauch and Forero, 2007 [125]	?		Dominican Republic
		Saicinae	Saica sp	42	AMNH_PBI 00218796	UCR	FJ230399	FJ230473	FJ230554	FJ230632, FJ230711			Palm fronds	Readio, 1927 [11]	?		French Guiana; Approuague-Kaw
		Salyavatinae	Lisarda nr. vandenplasi	177	AMNH_PBI 00218921	UCR	FJ230419	FJ230498	FJ230579	FJ230656, FJ230735			Bark-associated	Louis, 1974 [13]	Termites	McMahan, 1983 [22]	Guinea-Bissau
		Salyavatinae	Lisarda sp	78	AMNH_PBI 00218832	UCR	FJ230404	FJ230480	FJ230561	FJ230639, FJ230718			Bark-associated	Louis, 1974 [13]	Termites	McMahan, 1983 [22]	Singapore
		Salyavatinae	Salyavatinae sp	1583	UCR_ENT 00052207	UCR	JQ897841	JQ897603	JQ897672	JQ897757			Bark-associated	McMahan, 1983 [22]	Termites	McMahan, 1983 [22]	Brunei; Temburong
		Stenopodainae	Canthesancus sp	569	UCR_ENT 00052211	TIGER	JQ897784		JQ897624	JQ897701	JQ897870		?		?		Thailand; Phitsanulok
		Stenopodainae	Ctenotrachelus sp	166	UCR_ENT 00000181	UCR	FJ230415	FJ230494	FJ230575	FJ230652, FJ230731	JQ897873		?		?		Costa Rica
		Stenopodainae	Gageus micropterus Villiers	309	AMNH_PBI 00219021	CAS	FJ230445	FJ230524	FJ230606	FJ230678, FJ230757			?		?		Madagascar; Toamasina
		Stenopodainae	Kodormus bruneosus Barber	402	UCR_ENT 00000072	UCR	FJ230452	FJ230533		FJ230690, FJ230769			Ground-dwelling/On foliage	Miller, 1956 [109]	?		Costa Rica
		Stenopodainae	Oncocephalus sp	79	UCR_ENT 00000182	UCR	FJ230405	FJ230481	FJ230562	FJ230640, FJ230719	JQ897895		Ground-dwelling	Readio, 1927 [11]	Generalist predator	Vennison and Ambrose, 1987 [126]	Singapore
		Stenopodainae	Sastrapada sp	185	AMNH_PBI 00218929	UCR	FJ230423	FJ230502		FJ230660, FJ230739	JQ897920		?		Generalist predator	Villiers, 1948 [127]	Malaysia; Selangor/Pahang border
		Stenopodainae	Stenopoda sp	154	AMNH_PBI 00218904	UCR	FJ230414	FJ230493		FJ230651, FJ230730	JQ897924		Leaf litter/On foliage	Readio, 1927 [11], Haviland, 1931 [95]	?		Nicaragua
		Stenopodainae	Stenopodessa sp	398	UCR_ENT 00000078	FCAP	FJ230451	FJ230532		FJ230688, FJ230767			?		?		Brazil; Mato Grosso
		Stenopodainae	Thodelmus nigrispinosus Villiers	369	UCR_ENT 00000085	CAS	FJ230448	FJ230528		FJ230683, FJ230762			?		?		Madagascar; Antsiranana
		Stenopodainae	Stenopodainae sp	365	UCR_ENT 00052212	UCR	JQ897844		JQ897675	JQ897760			?		?		Singapore
		Triatominae	*Cavernicola pilosa Barber	2847	UCR_ENT 00040130	TAMU	JQ897785	JQ897550	JQ897627	JQ897704		Zelurus	Mammal dwelling	Lent and Wygodzinsky, 1979 [8]	Vertebrate blood	Lent and Wygodzinsky, 1979 [8]	Nicaragua; Rio San Juan
		Triatominae	Eratyrus mucronatus Stal	1811	UCR_ENT 00052168	UCR	JQ897794	JQ897555	JQ897635	JQ897711	JQ897882	Zelurus	Mammal dwelling	Lent and Wygodzinsky, 1979 [8]	Vertebrate blood	Lent and Wygodzinsky, 1979 [8]	French Guiana; Roura
		Triatominae	Panstrongylus geniculatus (Latreille)	1569	UCR_ENT 00052167	UCR	JQ897822	JQ897583	JQ897655	JQ897740	JQ897899	Zelurus	Mammal dwelling	Lent and Wygodzinsky, 1979 [8]	Vertebrate blood	Lent and Wygodzinsky, 1979 [8]	Costa Rica; Heredia
		Triatominae	Panstrongylus nr. geniculatus	1810	UCR_ENT 00052165	UCR	JQ897824	JQ897585	JQ897657	JQ897742	JQ897901	Zelurus	Mammal dwelling	Lent and Wygodzinsky, 1979 [8]	Vertebrate blood	Lent and Wygodzinsky, 1979 [8]	French Guiana; Roura
		Triatominae	Panstrongylus lignarius (Walker)	1813	UCR_ENT 00052166	UCR	JQ897823	JQ897584	JQ897656	JQ897741	JQ897900	Zelurus	Mammal dwelling	Lent and Wygodzinsky, 1979 [8]	Vertebrate blood	Lent and Wygodzinsky, 1979 [8]	French Guiana; Roura
		Triatominae	Paratriatoma hirsuta Barber	296	UCR_ENT 00218745	UCR	FJ230443	FJ230521	FJ230604	FJ230676, FJ230755		Zelurus	Mammal dwelling	Lent and Wygodzinsky, 1979 [8]	Vertebrate blood	Lent and Wygodzinsky, 1979 [8]	USA; California
		Triatominae	Rhodnius neglectus Lent	1573	UCR_ENT 00052203	UCR	JQ897839	JQ897601	JQ897670	JQ897755	JQ897918	Zelurus	Palm fronds/Bird Nest	Lent and Wygodzinsky, 1979 [8]	Vertebrate blood	Lent and Wygodzinsky, 1979 [8]	Ecuador; Orellana
		Triatominae	Rhodnius pictipes Stal	1815	UCR_ENT 00052208	UCR	JQ897840	JQ897602	JQ897671	JQ897756	JQ897919	Zelurus	Palm fronds/epiphytes	Lent and Wygodzinsky, 1979 [8]	Vertebrate blood	Lent and Wygodzinsky, 1979 [8]	French Guiana; Roura
		Triatominae	Triatoma dimidiata (Latreille)	1570	UCR_ENT 00052169	UCR	JQ897848	JQ897609	JQ897679	JQ897764	JQ897928	Zelurus	Mammal dwelling	Lent and Wygodzinsky, 1979 [8]	Vertebrate blood	Lent and Wygodzinsky, 1979 [8]	Costa Rica; Heredia
		Triatominae	Triatoma protracta Uhler	294	UCR_ENT 00218742	UCR	FJ230442	FJ230520		FJ230675, FJ230754	JQ897929	Zelurus	Mammal dwelling	Lent and Wygodzinsky, 1979 [8]	Vertebrate blood	Lent and Wygodzinsky, 1979 [8]	USA; California
		Triatominae	Triatoma recurva (Stal)	170	AMNH_PBI 00218913	UCR	FJ230417	FJ230496	FJ230577	FJ230654, FJ230733	JQ897930	Zelurus	Mammal dwelling	Lent and Wygodzinsky, 1979 [8]	Vertebrate blood	Lent and Wygodzinsky, 1979 [8]	Mexico; Sonora
		Triatominae	Triatoma venosa (Stal)	581	UCR_ENT 00052210	UCR	JQ897850	JQ897611	JQ897681	JQ897766	JQ897932	Zelurus	Mammal dwelling	Lent and Wygodzinsky, 1979 [8]	Vertebrate blood	Lent and Wygodzinsky, 1979 [8]	Costa Rica; Alajuela
		Triatominae	Triatoma sp	1574	UCR_ENT 00052202	UCR	JQ897849	JQ897610	JQ897680	JQ897765	JQ897931	Zelurus	Mammal dwelling	Lent and Wygodzinsky, 1979 [8]	Vertebrate blood	Lent and Wygodzinsky, 1979 [8]	Ecuador; Sucumbios
		Tribelocephalinae	Tribelocephala peyrierasi Villiers	287	AMNH_PBI 00219033	CAS	FJ230440	FJ230521	FJ230601				Leaf litter	Miller, 1956 [109]	?		Madagascar; Mahajanga
		Tribelocephalinae	Tribelocephalinae sp	1592	UCR_ENT 00052187	UCR	JQ897851	JQ897612	JQ897682	JQ897767			?		?		Brunei; Belait
		Vesciinae	Mirambulus niger Breddin	1817	UCR_ENT 00052182	UCR	JQ897811	JQ897571	JQ897645	JQ897729			Bark-associated	own obs	?		French Guiana; Regina
		Visayanocorinae	Carayonia orientalis Ishikawa and Okajima	1473	UCR_ENT 00052232	TIGER		JQ897549	JQ897626	JQ897703			On foliage	Ishikawa & Okajima, 2004 [128]	?		Thailand; Nakhon Nayok
		Visayanocorinae	Carayonia n. sp.	1536	UCR_ENT 00003627	CAS		JQ897548	JQ897625	JQ897702			On foliage	Ishikawa & Okajima, 2004 [128]	?		Madagascar; Antsiranana
