# Supplementary material for: Evolutionary History of Assassin Bugs (Insecta: Hemiptera: Reduviidae): Insights from Divergence Dating and Ancestral State Reconstruction
Source: PLoS One. 2012 Sep 28;7(9):e45523. doi: 10.1371/journal.pone.0045523 (PMC3460966; doi:10.1371/journal.pone.0045523)
Supplement: Table S3 — Table for bootstrap values of all subfamilies and Reduviinae clades based on different sequence alignment algorithms. (XLS) [file pone.0045523.s004.xls]

## Sheet: Sheet1
			RaxML	TNT	RaxML	RaxML	RaxML	RaxML
		Other subfamilies	GINSI	GINSI	EINSI	LINSI	MUSCLE	QINSI
		Hammacerinae	100	100	100	100	100	100
		Holoptilinae	100	99	100	100	100	100
		Phymatinae	100	100	100	100	100	100
		Peiratinae	100	91	100	100	100	100
		Saicinae	44	NA	74	NA	85	43
		Visayanocorinae	100	99	100	100	100	100
		Emesinae + Visayanocorinae + Saicinae	50	NA	55	NA	71	75
		Ectrichodiinae	93	NA	100	98	92	95
		Tribelocephalinae	100	97	100	100	100	100
		Stenopodainae	100	98	100	100	100	99
		Physoderinae	100	NA	100	100	100	100
		Salyavatinae	100	100	100	100	100	100
		Reduviinae + others
		Pasiropsis	65	93	83	86	47	85
		Psophis	100	98	100	100	100	100
		Nanokerala	100	100	100	100	100	100
		Psophis + Nanokerala	59	NA	75	78	32	83
		Zelurus	53	70	69	74	NA	77
		Opisthacidius	100	100	100	100	100	100
		Cavernicola + Rhodnius	80	98	80	77	80	81
		Opisthacidius + Cavernicola + Rhodnius	67	NA	67	52	55	51
		Triatomini	94	98	94	99	95	100
		Triatomini + Opisthacidius + Cavernicola + Rhodnius	99	91	100	96	89	93
		Zelurus + Opisthacidius + Triatominae	96	91	96	95	97	99
		Leogorrus	99	99	100	99	99	100
		Alloeocranum + Reduvius + Durevius	32	NA	32	28	30	19
		Reduvius + Durevius	100	99	100	100	100	100
		Gerbelius + Kayanocoris	100	99	100	100	100	100
		Leogorrus + Reduvius + Alloeocranum + Durevius + Gerbelius + Kayanocoris	37	NA	38	36	38	41
		Microlestria	100	100	100	100	100	100
		Nalata	100	NA	100	100	100	100
		Physoderes + Nalata	72	NA	80	91	50	NA
		Physoderes + Nalata + Microlestria	78	NA	78	77	82	86
		Pseudozelurus	100	100	100	100	100	100
		Durganda + Tiarodes	100	100	100	100	100	100
		Velitra + Dyakocoris + Tapeinus + Staliastes	100	94	100	100	99	99
		Durganda + Tiarodes + Velitra + Dyakocoris + Tapeinus + Staliastes	60	NA	82	58	NA	98
		Cethera	100	100	100	100	100	100
		Eupheno	100	NA	100	100	100	100
		Varus + Cethera	74	76	73	64	48	30
		Noualhierana + Eupheno	56	NA	61	57	42	54
		Censorinus + Durganda + Tiarodes + Velitra + Dyakocoris + Tapeinus + Staliastes	35	NA	NA	42	NA	NA
		Pseudozelurus + Censorinus + Durganda + Tiarodes + Velitra + Dyakocoris + Tapeinus + Staliastes	43	NA	NA	48	40	NA
		Platymeris + Acanthaspis + Plynoides + Paraplynus + Inara + Paredocla	50	NA	82	55	50	NA
		Acanthaspis + Plynoides + Paraplynus + Inara + Paredocla	97	NA	92	96	66	95
		Salyavatinae + Platymeris + Acanthaspis + Plynoides + Paraplynus + Inara + Paredocla	56	NA	68	28	61	21
