# Supplementary material for: Evolutionary History of Assassin Bugs (Insecta: Hemiptera: Reduviidae): Insights from Divergence Dating and Ancestral State Reconstruction
Source: PLoS One. 2012 Sep 28;7(9):e45523. doi: 10.1371/journal.pone.0045523 (PMC3460966; doi:10.1371/journal.pone.0045523)
Supplement: Table S5 — Summary table of age estimates of selected reduviid clades with 95% highest probability density intervals. (XLS) [file pone.0045523.s006.xls]

## Sheet: Sheet1
		Age (Ma)	95% HPD
	Reduviidae	178.31	[176, 184.98]
	Higher Reduviidae-Phymatine Complex split	160.25	[137.19, 179.59]
	Hammacerinae	141.75	[118.73, 167.61]
	Phymatinae	113.69	[91.12, 140.1]
	Centrocnemidinae-Holoptilinae split	89.5	[66.63, 115.4]
	Peiratinae	96.85	[81.44, 112.74]
	Tribelocephalinae + Ectrichodiinae	83.61	[72.87, 95.55]
	Ectrichodiinae	67.47	[57.03, 79.65]
	Zelurus + Opisthacidius + Triatominae	52.89	[41.64, 64.56]
	Opisthacidius + Triatominae	37.41	[29.74, 45.34]
	Triatomini	31.26	[24.23, 38.17]
	Rhodniini + Cavernicolini	27.54	[21.05, 33.49]
	Rhodniini	22.18	[15.26, 27.97]
	Salyavatinae	41.62	[31.35, 56.7]
	Acanthaspis	39.16	[29.8, 47.86]
	Microlestria + Physoderes + Nalata	62.18	[53.43, 72.85]
	Reduvius + Alloeocranum + Durevius	50.17	[36.93, 61.35]
	Harpactorinae + Neostachyogenys	64.56	[54.6, 75.58]
	Apiomerini	42.04	[31.09, 52.67]
	Harpactorini	50.11	[40.05, 61.03]
