# Supplementary material for: Evolutionary History of Assassin Bugs (Insecta: Hemiptera: Reduviidae): Insights from Divergence Dating and Ancestral State Reconstruction
Source: PLoS One. 2012 Sep 28;7(9):e45523. doi: 10.1371/journal.pone.0045523 (PMC3460966; doi:10.1371/journal.pone.0045523)
Supplement: Table S6 — Distant’s 1904 classification of Reduviinae (Acanthaspidinae) into six divisions. (XLS) [file pone.0045523.s007.xls]

## Sheet: Sheet1
	Subfamily	Divisions	Genus
	Reduviinae (Acanthaspidinae)	1. Psopharia	Psophis
			Euvonymus
		2. Epiroderaria	Centrocnemis
			Epirodera
			Marbodus
		3. Reduviaria	Alloeocranum
			Reduvius
			Gerbelius
		4. Acanthaspisaria	Pasira
			Pasiropsis
			Acanthaspis
			Inara
			Edocla
		5. Lenaearia	Velitra
			Lenaeus
			Paralenaeus
			Sminthocoris
			Apechtia
		6. Conorhinaria	Durganda
			Tiarodes
			Conorhinus
			Linshcosteus
			Cerilocus
