# Supplementary material for: Evolutionary History of Assassin Bugs (Insecta: Hemiptera: Reduviidae): Insights from Divergence Dating and Ancestral State Reconstruction
Source: PLoS One. 2012 Sep 28;7(9):e45523. doi: 10.1371/journal.pone.0045523 (PMC3460966; doi:10.1371/journal.pone.0045523)
Supplement: Table S7 — Proposed clade-membership of Reduviinae genera. Footnote: genera in bold font represent genera included in present study, genera in regular font are genera absent here. (XLS) [file pone.0045523.s008.xls]

## Sheet: Sheet1
	Acanthaspis clade
		Acanthaspis Amyot & Serville
		Inara Stål
		Paraplynus Schouteden
		Paredocla Jeannel
		Platymeris Laporte
		Plynoides Schouteden
		Varus Stål
		Diplosiacanthia Breddin
		Edocla Stål
		Edoclella Miller
		Empyrocoris Miller
		Leptacanthaspis Jeannel
		Neotrichedocla Villiers
		Plynaspoides Miller
		Plynus Stål
		Psytalla Stål
		Raipurocoris Miller
		Stigmonotocoris Miller
		Tetroxia Amyot & Serville
		Trichedocla Jeannel
		Ukambocoris Miller
	Reduvius clade
		Alloeocranum Reuter
		Durevius Villiers
		Gerbelius Distant
		Kayanocoris Miller
		Leogorrus Stål
		Reduvius Fabricius
		Cyclopocoris Miller
		Kobacoris Villiers
		Microvarus Jeannel
		Paragerbelius Miller
		Peregrinator Kirkaldy
		Perissopygocoris Miller
		Pseudoreduvius Villiers
		Stesiochorus Distant
	Velitra clade
		Durganda Amyot & Serville
		Dyakocoris Miller
		Staliastes Kirkaldy
		Tapeinus Laporte
		Tiarodes Burmeister
		Velitra Stål
		Durgandana Miller
		Lenaeus Stål
		Neotiarodes Miller
		Tiarodurganda Breddin
		Velitroides Miller
	Nalata clade
		Microlestria Stål
		Nalata Stål
		Physoderes Westwood (Physoderinae)
		Aradomorpha Champion
	Zelurus clade
		Opisthacidius Berg
		Triatominae
		Zelurus Burmeister
		Gnistus Stål
		Holotrichius Burmeister
		Zeluroides Lent & Wygodzinsky
	Psophis clade
		Nanokerala Wygodzinsky & Lent
		Psophis Stål
		Hadrokerala Wygodzinsky & Lent
		Namapa Wygodzinsky & Lent
	Pasiropsis clade
		Pasira Stål
		Pasiropsis Reuter
		Haplonotocoris Miller
		Jacobsonocoris Miller
		Nannolestes Bergroth
	Neostachyogenys clade
		Neostachyogenys Miller
		Marbodus Distant
	Pseudozelurus
		Pseudozelurus Lent & Wygodzinsky
	Noualhierana
		Noualhierana Miller
		Australocleptes Miller
		Dilophocoris Miller
		Horcinia Stål
		Sphedanocoris Stål
		Sphedanovarus Jeannel
		Tympanistocoris Miller
	Censorinus
		Censorinus Distant
		Centrogonus Bergroth
		Neocentrogonus Miller
	Incertae sedis
		Anacerilocus Miller
		Apechtia Reuter
		Apechtiella Miller
		Apteroreduvius Villiers
		Archilestidium Breddin
		Bergrotheus Schouteden
		Brachytonus China
		Cargasdama Villiers
		Cerilocus Stål
		Cheronea Stål
		Cheronella Miller
		Corupaia Lent & Wygodzinsky
		Crociaeus Breddin
		Croscius Stål
		Drescherocoris Miller
		Ectmetacanthspis Reuter
		Edoclina Jeannel
		Eriopreda Jeannel
		Eriopredoides Miller
		Euvonymys Distant
		Ganesocoris Miller
		Hermilloides Schouteden
		Hermillus Stål
		Heteropinus Breddin
		Hoberlandtia Villiers
		Horciniella Miller
		Iphithereuta Breddin
		Isdegardes Distant
		Junghuhnidia Breddin
		Kalshovenia Miller
		Khafra Distant
		Khafrana Miller
		Kopsteinia Miller
		Korinchocoris Miller
		Lamabokeus Villiers
		Lydenburgia Miller
		Mankuninga Distant
		Mardania Stål
		Moramanga Villiers
		Neervoortia Miller
		Neivacoris Lent & Wygodzinsky
		Neocerilocus Miller
		Neocheronea Miller
		Neokhafra Miller
		Nyplus Villiers
		Pantopsilus Berg
		Paracerilocus Miller
		Parahermillus Miller
		Paralenaeus Reuter
		Parapechtia Miller
		Patago Bergroth
		Pelurgocoris Miller
		Phaurolestes Bergroth
		Pheletocoris Miller
		Phonergates Stål
		Phyja Distant
		Platymicrus Bergroth
		Poecilopterocoris Miller
		Recicolus Jeannel
		Schoutedenana Miller
		Schultheissidia Breddin
		Stachyogenys Stål
		Timotheus Distant
		Voconia Stål
